# Supplementary material for: Self-assembled 3D porous flowerlike α-Fe2O3 hierarchical nanostructures: Synthesis, growth mechanism, and their application in photocatalysis
Source: Royal Society of Chemistry journal article supplement (doi:10.1039/c2dt11822j), 2012-01-01
Supplement: c2dt11822j.pdf [file c2dt11822j.pdf]

## Supporting Information

### Self-Assembled 3D Flowerlike $\alpha$ -Fe<sub>2</sub>O<sub>3</sub> Hierarchical Nanostructures : Synthesis, Growth Mechanism, and their Application in Photocatalysis

Lu-Ping Zhu<sup>a,\*</sup>, Nai-Ci Bing<sup>a</sup>, Ling-Ling Wang<sup>a</sup>, Hai-Ying Jin<sup>a</sup>, Gui-Hong Liao<sup>b</sup> and Li-Jun Wang<sup>a,\*</sup>

<sup>a</sup>School of Urban Development and Environmental Engineering, Shanghai Second Polytechnic University, Shanghai, 201209, China, [lpzhu@eed.sspu.cn](mailto:lpzhu@eed.sspu.cn); [wang\\_lijun@yahoo.cn](mailto:wang_lijun@yahoo.cn).

<sup>b</sup>Technical Institute of Physics and Chemistry, Chinese Academy of Sciences, Beijing 100190, China.

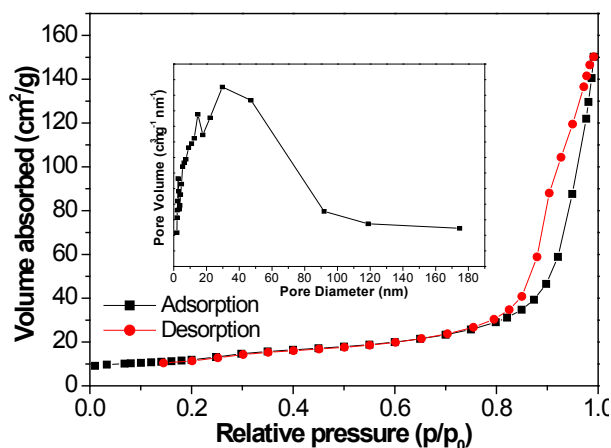

**Fig. SI 1** Typical N<sub>2</sub> gas adsorption-desorption isotherm of the porous flowerlike  $\alpha$ -Fe<sub>2</sub>O<sub>3</sub> HNs at 200°C, urea/Fe<sup>3+</sup>=5. Inset: the corresponding pore-size distribution.

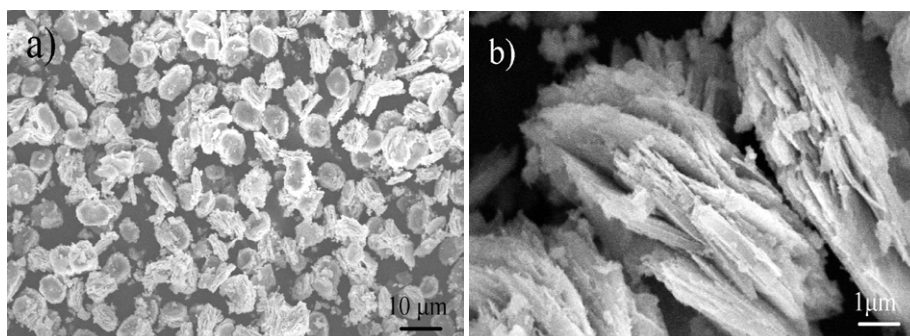

**Fig. SI 2** SEM image of the samples prepared in ethylene glycol at 200 °C, urea/Fe<sup>3+</sup>=5.

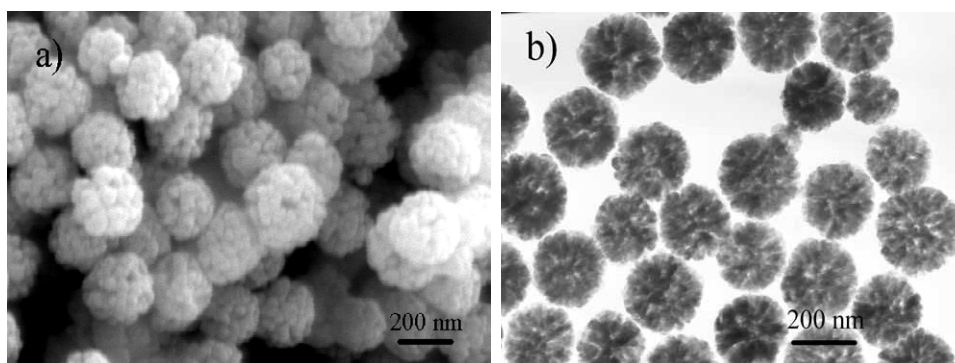

**Fig. SI 3** SEM (a) and TEM (b) images of the samples prepared in ethylene glycol at 200 °C, and ethylenediamine (EDA) as mineralizer.<sup>a</sup>

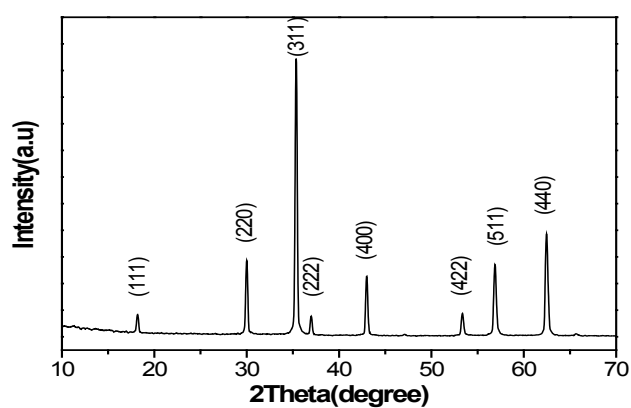

**Fig. SI 4** XRD pattern of of the samples prepared in ethylene glycol at 200 °C, and ethylenediamine (EDA) as mineralizer.<sup>a</sup>

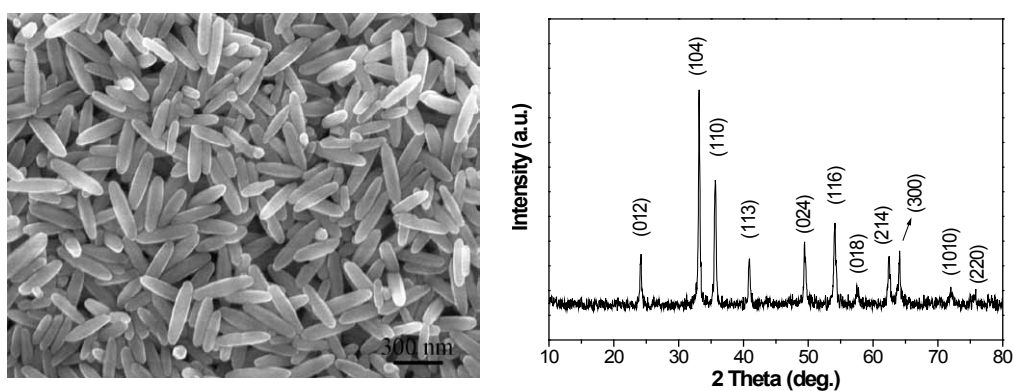

**Fig. SI-5** SEM image and XRD pattern of the samples prepared in aqueous solution at 180 °C, and ethylenediamine (EDA) as mineralizer.<sup>b</sup>

## References

(a) L. P. Zhu, G. H. Liao, N. C. Bing, L. L. Wang and H. Y. Xie, *J. Solid State Chem.* 2011, 184, 2405.

(b) L. P. Zhu, G. H. Liao, N. C. Bing, X. Zhao and Y. Y. Gu, *Mater. Lett.* 2011, **65**, 1287.
